# Effect of Host Plants on Developmental Time and Life Table Parameters of *Carposina sasakii* (Lepidoptera: Carposinidae) Under Laboratory Conditions

XIHONG LEI,<sup>1</sup> DINGXU LI,<sup>2,3</sup> ZHENG LI,<sup>3</sup> FRANK G. ZALOM,<sup>4</sup> LINGWANG GAO,<sup>1,2</sup>  
AND ZUORUI SHEN<sup>1</sup>

Environ. Entomol. 41 (2): 349–354 (2012); DOI: <http://dx.doi.org/10.1603/EN11244>

**ABSTRACT** Studies were designed to examine the effects of host plants (apricot, *Prunus armeniaca* L.; plum, *Prunus salicina* L.; peach, *Prunus persica* L.; jujube, *Zizyphus jujuba* Will.; apple, *Malus domestica* Mill.; and pear, *Pyrus sorotina* Will) on the development and life table parameters of the peach fruit moth, *Carposina sasakii* Matsumura (Lepidoptera: Carposinidae) under laboratory conditions. Peach fruit moth developed faster (12.48 d) and had the highest preimaginal survival rate (50.54%) on plum compared with the other host plants. Adult longevity was significantly longer on jujube for both female and male moths. Adult females from larvae reared on jujube and peach laid significantly greater numbers of eggs (214.50 and 197.94 eggs per female, respectively) compared with those reared on the other four host plants. Life-table parameters were calculated for each host plant and compared by jackknife procedures. The intrinsic rate of natural increase ( $r_m$ ) was significantly greatest on plum (0.1294 eggs per female per d), followed by jujube and apricot (0.1201 and 0.1128 eggs per female per d), respectively. Implications of the various measures of population performance are discussed.

**KEY WORDS** *Carposina sasakii*, duration, fecundity, host plant, survival rate

The peach fruit moth, *Carposina sasakii* Matsumura, is a quarantine pest for Europe (CABI/EPPO 1990) and is widely distributed in northeast Asia including China, Japan, Korea, and the Russian Far East (Hwang et al. 1958, Liu et al. 1997, Kim et al. 2000, Ishiguri and Toyoshima 2006). In Northern China, this pest regularly causes economic damage to deciduous fruit trees such as apple (*Malus domestica* Mill), pear (*Pyrus sorotina* Will), and jujube (*Zizyphus jujuba* Will) (Hwang et al. 1958, Tung et al. 1964, Chang et al. 1977, Hua 1993, Liu et al. 1997). Generally, *C. sasakii* infests fruit trees by laying eggs on the calyx end, stalk cavity of fruits, or both. On hatching, the larva bores into a fruit, then feeds on the fruit flesh and moves deeply into the core. The mature larva emerges from the fruit and drops onto the ground where it pupates or enters a larval diapause to overwinter (Hwang et al. 1958, Toshima et al. 1961, Kim et al. 2000). At high population densities, it regularly causes substantial fruit losses (Chang et al. 1977, Liu et al. 1997, Hua et al. 1998b, Ling et al. 2010).

Since the beginning of this century, apple production in most growing areas of China has decreased, whereas production of stone fruit such as peach (*Prunus persica* L.), plum (*Prunus salicina* L.), and apricot (*Prunus armeniaca* L.) has increased (Li 2003). These stone fruit trees commonly are intercultivated or mix-cultivated with apple, thus facilitating emigration of *C. sasakii* onto the different host plants and changing the ecological environment inhabited by this pest. Previous studies about *C. sasakii* focused mainly on the effects of apple on larval development and survival (Hua et al. 1996, Kim et al. 2001, Ishiguri and Toyoshima 2006, Li et al. 2010a, Toyoshima et al. 2010); impacts of several host plants on diapause status (Hua et al. 1996, Hua et al. 1998a); host-driven biotype (Hua 1993, Hua and Hua 1995); and genetic diversity (Xu and Hua 2004). However, relatively few studies have been conducted to compare the effects of different host plants on development rate and population dynamics of the pest (Chang et al. 1977, Kim and Lee 2002).

To improve our understanding of *C. sasakii*-host interactions, which have an important influence on the dynamics and management of pest populations (Myers et al. 2007), we investigated the effects of several stone and pome fruit host plant on the survivorship and reproduction of *C. sasakii* by examining duration of each developmental stage and fecundity, as well as life table parameters on six species of host

<sup>1</sup> Department of Entomology, China Agricultural University, Beijing, 100193 P. R. China.

<sup>2</sup> Corresponding author, e-mail: dingxu\_li@yahoo.com.cn and lwgao1966@gmail.com.

<sup>3</sup> Department of Plant Protection, Henan University of Science and Technology, Luoyang, Henan Province, 471003 P. R. China.

<sup>4</sup> Department of Entomology, University of California, Davis, CA 95616.

**Table 1.** Durations (d ± SE) of each stage of *C. sasakii* on various host plants

| Host plants | Egg          | Larva         | Pre-cocoon    | Pupa          | Female longevity | Male longevity |
|-------------|--------------|---------------|---------------|---------------|------------------|----------------|
| Apricot     | 6.61 ± 0.03a | 15.21 ± 0.08c | 0.47 ± 0.02c  | 11.11 ± 0.05c | 6.52 ± 0.14bc    | 6.30 ± 0.19b   |
| Plum        | 6.63 ± 0.06a | 12.48 ± 0.10e | 0.56 ± 0.03c  | 10.96 ± 0.05c | 5.63 ± 0.44c     | 5.82 ± 0.61b   |
| Peach       | 6.60 ± 0.05a | 13.50 ± 0.12d | 0.76 ± 0.05b  | 11.43 ± 0.08b | 6.76 ± 0.46bc    | 6.38 ± 0.78b   |
| Jujube      | 6.62 ± 0.13a | 15.47 ± 0.10c | 0.80 ± 0.02ab | 11.68 ± 0.07b | 11.02 ± 0.68a    | 10.30 ± 0.72a  |
| Apple       | 6.81 ± 0.91a | 18.13 ± 0.22b | 0.90 ± 0.07a  | 12.19 ± 0.15a | 6.75 ± 0.34bc    | 6.80 ± 0.51b   |
| Pear        | 6.60 ± 0.08a | 19.15 ± 0.44a | 0.78 ± 0.04b  | 11.56 ± 0.14b | 7.60 ± 0.46b     | 5.84 ± 0.86b   |

Note: values within the same column followed by the same letter are not significantly different ( $P > 0.05$ , Fisher's LSD).

plants, which would not only enhance our biological knowledge of the insect, but would be integral for developing efficient integrated pest management programs for controlling *C. sasakii*.

### Materials and Methods

**Host Plants.** The plants evaluated are common fruit trees in Northern China: apricot (*Prunus armeniaca* L. 'Golden sun'), plum (*Prunus salicina* L. 'Oishi wase'), peach (*Prunus persica* L. 'Beijing-2'), jujube (*Zizyphus jujuba* Will. 'Candied'), apple (*Malus domestica* Mill. 'Golden delicious'), and pear (*Pyrus sorotina* Will. 'Mengjinsu'). Untreated fruit were collected on 7 June, 21 June, 28 June, 20 July, 23 July, and 26 July 2010, respectively, based on previous field observation (Hwang et al. 1958, Chang et al. 1977) and recent pheromone trapping captures of *C. sasakii* males in different orchards (Hua 1993, Hua et al. 1998b, Li et al. 2010b, Ling et al. 2010). Samples of 60–100 unripened but approximately equal size fruits were used for each host plant evaluation.

**Insect Source.** The colony of *C. sasakii* used in this study was initiated using individuals collected from an apple orchard in Luoyang, Henan province, in Northern China in August 2009. After a larva emerged from its fruit, it was placed on soil (sand type with moisture: 10%) within a glass vial (18 mm in diameter, 120 mm in height) for pupation and emergence. Newly emerged females and males were paired in Perspex cages (100 mm in diameter, 100 mm in height) covered with absorbent gauze, and 10% (wt:vol) sugar water was provided for food. Two pieces of corrugated filter paper (30 mm by 50 mm) were placed on the bottom of each cage for egg laying. The progeny were reared on apples (*M. domestica* Mill. 'Fuji') for successive generations in the laboratory under conditions of 23 ± 1°C, 80 ± 7% RH, and a photoperiod of 15:9 (L: D) h in a climatic chamber (Li et al. 2010a).

**Development and Survival.** Eggs laid within 12 h were collected on the filter paper substrate from the colony, and was cut into pieces with 1–2 eggs. Each egg paper was maintained on a 3-mm layer of agar (1% wt:vol) inside a petri dish (90 mm in diameter) under the colony conditions. Upon hatching, each egg paper was attached onto the calyx end (apple and pear) or stalk cavity (apricot, plum, peach, and jujube) of one fruit with agar (1% wt:vol), and kept in a covered plastic cup (90 mm in diameter, 100 mm in height). All the cups were maintained in climatic chambers set at

the same conditions as the colony and checked every 4 h from 900 to 2100 hr to determine the hatch, boring time, and emergence time. When mature larvae emerged from the fruit, they were weighed using a Mettler XS104 balance of precision ± 0.1 mg (Mettler-Toledo Inc. Shanghai, China), and transferred individually into a vial for pupation and emergence. Duration of larval stage was measured as the time from hatching to emergence from fruit, and the pupal stage from cocooning to adult emergence.

**Longevity and Reproduction.** Newly emerged females and males from each host plant were paired as previously stated and maintained in another climatic chamber set at the colony conditions. Eggs were collected twice daily until the adults died. Data obtained from unmated female as indicated by the shape of copulatory pouch (Li et al. 2010a) were excluded from the analyses.

**Statistical Analyses.** Effect of host plant on the duration of each stage was analyzed with one-way analysis of variance (ANOVA) followed by Fisher least significant difference test (PROC ANOVA, SAS Institute 1999). We used an arcsine square-root transformation for hatching rate, boring rate and exiting rate data, before performing the ANOVA. Population growth rates in each treatment were estimated from life tables (Birch 1948) using the equation:

$$l = \sum e^{-r_m \cdot x} \cdot l_x \cdot m_x$$

Where  $l_x$  is age-specific survival, and  $m_x$  the number of total reproductive output per female for each age interval ( $x$ ). From these data, the intrinsic rate of natural increase ( $r_m = \text{egg}/\text{female}/\text{d}$ ), net reproduction ( $R_0 = \text{egg per female per generation}$ ), mean generation time ( $T = \ln(R_0)/r_m$ , in days), finite rate of growth ( $\lambda = \exp r_m$ ), and doubling time ( $Dt = \ln 2/r_m$ ) were estimated. After  $r_m$  was computed from the original data ( $r_{all}$ ) the differences in  $r_m$ -values were tested for significance by estimating the variance using the jackknife method (Meyer et al. 1986, de Maia et al. 2000). Each parameter was considered significantly different among host plants if there was no overlap of the 95% CL.

### Results

**Duration on Various Host Plants.** The duration of each *C. sasakii* stage reared on the six host plants is shown in Table 1. There was no variation in the incubation period of the eggs in each trial, but significant

**Table 2.** Survivorship (% ± SE) of *C. sasakii* on various host plants

| Host plants | Hatching rate | Boring rate   | Exiting rate  | Body wt       | Cocooning rate | Emergence rate | Preimaginal survival rate |
|-------------|---------------|---------------|---------------|---------------|----------------|----------------|---------------------------|
| Apricot     | 93.63 ± 0.91a | 54.09 ± 1.66b | 77.93 ± 2.42a | 25.49 ± 0.31c | 93.82 ± 0.73a  | 94.51 ± 1.00a  | 35.00                     |
| Plum        | 94.89 ± 1.37a | 73.99 ± 2.05a | 79.46 ± 1.58a | 23.15 ± 0.31d | 94.49 ± 0.64a  | 95.87 ± 1.52a  | 50.54                     |
| Peach       | 94.58 ± 0.71a | 30.60 ± 2.01d | 82.49 ± 5.35a | 25.62 ± 0.58c | 91.99 ± 0.19a  | 94.66 ± 2.68a  | 20.79                     |
| Jujube      | 94.49 ± 1.43a | 78.66 ± 1.84a | 78.42 ± 2.08a | 19.48 ± 0.26e | 92.14 ± 1.92a  | 92.19 ± 2.21a  | 49.51                     |
| Apple       | 94.00 ± 2.00a | 73.84 ± 5.76a | 62.90 ± 5.26b | 26.98 ± 0.71b | 93.38 ± 0.61a  | 95.58 ± 2.29a  | 38.97                     |
| Pear        | 94.22 ± 1.43a | 40.78 ± 2.39c | 52.60 ± 5.29b | 28.50 ± 0.63a | 93.31 ± 0.10a  | 94.99 ± 1.68a  | 17.91                     |

Note: values within the same column followed by the same letter are not significantly different ( $P > 0.05$ , Fisher's LSD).

differences were observed in the larval period ( $F = 228.49$ ;  $df = 5, 702$ ;  $P < 0.0001$ ), precocoon period ( $F = 30.83$ ;  $df = 5, 681$ ;  $P < 0.0001$ ), and pupal stage ( $F = 24.46$ ;  $df = 5, 517$ ;  $P < 0.0001$ ) on the various host plants. Larval duration was the longest on pear followed by apple, and the shortest on plum. Precocoon periods on apricot and plum were significantly shorter than that of those on other four species of hosts, while the longest was on apple which was not significantly different from jujube. Pupal periods on apricot and plum were significantly shorter than that of those on other tested host plants, whereas the longest was on apple. Adult longevity for females ( $F = 20.28$ ;  $df = 5, 178$ ;  $P < 0.0001$ ) and males ( $F = 10.88$ ;  $df = 5, 142$ ;  $P < 0.0001$ ) were longest on jujube.

**Survivorship on Various Host Plants.** Significant differences were observed in body weight among mature larvae fed on the different host plants ( $F = 72.58$ ;  $df = 5, 704$ ;  $P < 0.0001$ ; Table 2). The heaviest were those reared on pear, and the lightest were reared on jujube. No significant differences were found in hatching rate ( $F = 0.11$ ;  $df = 5, 26$ ;  $P = 0.9881$ ), cocooning rate ( $F = 0.63$ ;  $df = 5, 23$ ;  $P = 0.6786$ ), and emergence rate ( $F = 0.53$ ;  $df = 5, 26$ ;  $P = 0.7519$ ) among the host plants. However, the boring rates of neonatal larvae were significantly different ( $F = 58.51$ ;  $df = 5, 26$ ;  $P < 0.0001$ ), with the lowest rate observed on peach. Exiting rates (percentage of larvae emerging from fruit among those penetrated) on pear and apple were significantly lower compared with the other four hosts ( $F = 10.32$ ;  $df = 5, 26$ ;  $P < 0.0001$ ). Survival rates from egg to adult were calculated highest on plum, and lowest on pear.

**Age-specific Survivorship and Fecundity.** Daily age-specific survivorship and fecundity curves are shown in Fig. 1 (A≈F). High mortality occurred during boring periods on peach and pear. The earliest reproduction peak appeared on plum on day 33 (45.15 eggs/female), followed by peach on the day 36 (61.11 eggs per female), whereas the latest was on apple on day 42 (32.20 eggs/female).

**Reproduction.** Mating rate of adult *C. sasakii* was not significantly influenced by host plant ( $F = 2.64$ ;  $df = 5, 12$ ;  $P = 0.0783$ ; Table 3), though Fisher least significant difference test indicated that the highest rate was on jujube, which was not significantly different from peach and plum. There was no variation in preoviposition period ( $F = 0.30$ ;  $df = 5, 171$ ;  $P = 0.9114$ ), but the duration of oviposition was significantly affected by host plant ( $F = 14.77$ ;  $df = 5, 173$ ;

$P < 0.0001$ ), the longest being on jujube. Fecundity also was significantly influenced by the different host plants upon which larvae were reared ( $F = 4.14$ ;  $df = 5, 183$ ;  $P = 0.0014$ ); females from larvae reared on jujube and peach laid a significantly greater number of eggs compared with those from the other four host plants.

**Life Table Parameters.** Host plants also played a role in affecting the population growth parameters of *C. sasakii* (Table 4). The highest  $R_0$  occurred on jujube which was not significantly different from plum, and no significant differences were found among peach, apple and pear based on the 95% jackknife estimates. The longest mean generation time ( $T$ ) was observed on apple and this was approximately the same time as on pear, and the shortest on plum. Consequently, the highest  $r_m$  was calculated for plum followed by jujube and apricot, and the lowest  $r_m$  was on pear albeit not significantly different from apple.

**Discussion**

Host plant quality can affect life history characteristics of herbivores by impairing growth, lowering resistance to disease, and reducing fecundity (Price et al. 1980). The current results demonstrated that host plants did have a direct affect on *C. sasakii* larval development, acted indirectly on longevity and reproduction, and life table parameters of *C. sasakii* were also affected (Tables 1, 3, and 4). Indeed, the results show that the host plants had substantial effects on net reproduction rate ( $R_0$ ) and intrinsic rate of increase ( $r_m$ ).

Data on development and reproduction of *C. sasakii* on different host plants provide a valuable insight into ecological attributes of these hosts, such as the anticipated population growth parameters relative to a particular host. The current study has shown that the larval development and preimaginal survival rates varied among the different host plants (Tables 1 and 2). For example, larvae reared on plum developed faster (12.48 d) and had a higher preimaginal survival rate (50.54%) than those reared on any of the other host plants in our study. Larval duration on Golden delicious apple at 23°C (18.13 d) was similar to that reported by Li et al. (2010a) and to that on Fuji apple at 22.5°C (16.8–16.9 d) (Toyoshima et al. 2010). It is difficult to compare development on other host plants because of a lack of reported data. In addition, mature larvae attained various body weights on the different

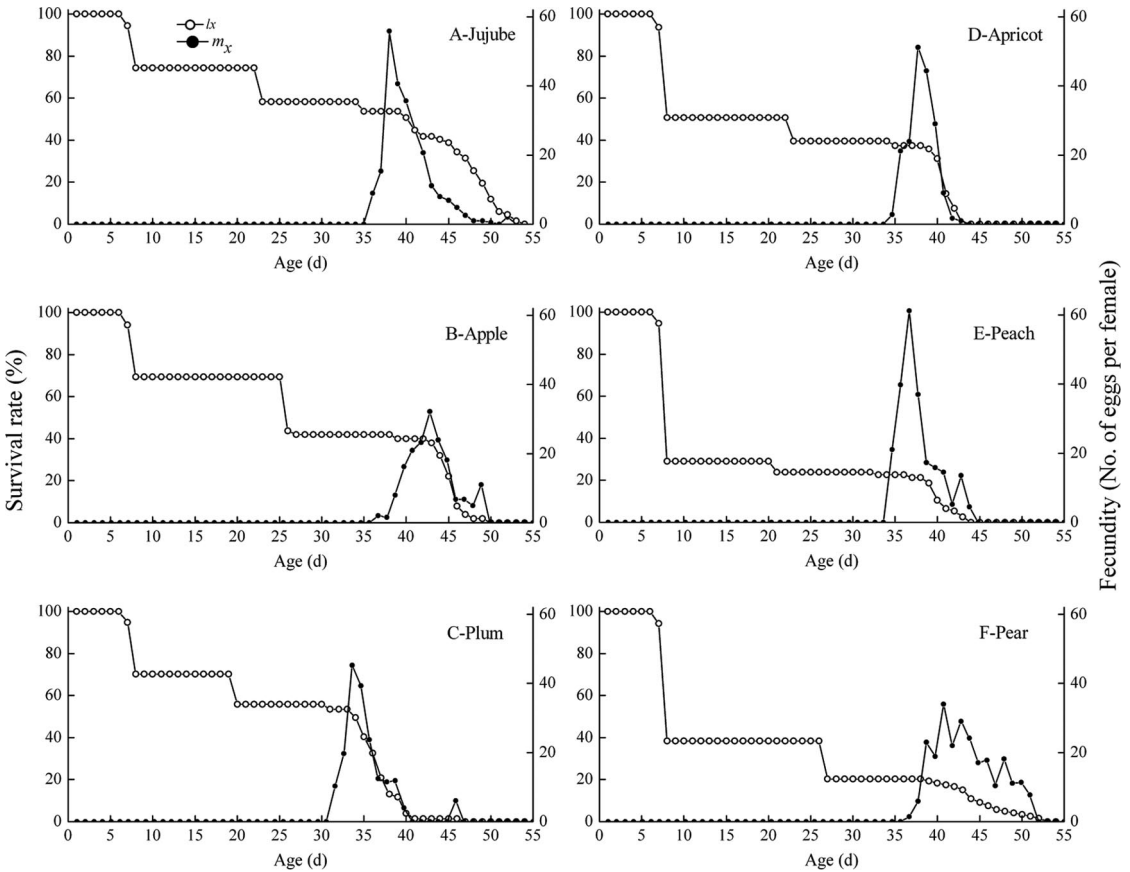

Fig. 1. Age-specific survival ( $I_x$ ) and fecundity ( $m_x$ ) of *C. sasakii* on various host plants: (A) Jujube, (B) Apple, (C) Plum, (D) Apricot, (E) Peach, (F) Pear.

host plants as well (Table 2). This variability may be because of nutritional and phago-stimulants of the fruit in our study.

The intrinsic rate of population increase ( $r_m$ ) is the most important parameter of population dynamics under specific climatic and food conditions (Varley and Gradwell 1970, Southwood and Henderson 2000). Rapid population increase can be achieved by a high reproduction rate, short developmental time, or both, but the relative contribution of these parameters in population increase is not equal (Krips et al. 1998). In current study, for example, the shorter development time was responsible for the highest  $r_m$ , which was calculated on plum, whereas higher net reproduc-

tion rate ( $R_0$ ) should be ascribed to the greater  $r_m$  on jujube. The higher  $r_m$  values on jujube and plum might imply higher infestation level on these host plants. In fact, severe field infestations of *C. sasakii* have well been confirmed on jujube in Northern China (Hwang et al. 1958, Tung et al. 1964, Liu et al. 1997), but, to our knowledge, data about *C. sasakii* infestation level on plum fruit is unavailable. Thus, more attention might be paid to plum in the inter-cropping or mixed-cropping orchards, although further investigations of *C. sasakii* under field conditions were needed.

Because *C. sasakii* larvae rely entirely on fruit for food, fruit quality could directly affect larval devel-

Table 3. Effects of host plants on the reproduction of *C. sasakii*

| Host plants | Mating rate (%) | Preoviposition (d) | No. eggs per female | Duration of oviposition (d) |
|-------------|-----------------|--------------------|---------------------|-----------------------------|
| Apricot     | 82.44 ± 2.12b   | 2.31 ± 0.13a       | 179.51 ± 9.43ab     | 3.84 ± 0.20b                |
| Plum        | 83.84 ± 1.88ab  | 2.16 ± 0.11a       | 142.51 ± 12.38b     | 3.50 ± 0.33b                |
| Peach       | 84.92 ± 0.79ab  | 2.16 ± 0.19a       | 197.94 ± 21.65a     | 4.59 ± 0.49b                |
| Jujube      | 91.67 ± 2.08a   | 2.30 ± 0.12a       | 214.50 ± 12.39a     | 7.43 ± 0.51a                |
| Apple       | 80.09 ± 3.79b   | 2.25 ± 0.15a       | 150.21 ± 14.44b     | 4.65 ± 0.41b                |
| Pear        | 80.36 ± 3.72b   | 2.36 ± 0.21a       | 171.68 ± 18.80ab    | 4.52 ± 0.48b                |

Note. Values (means ± SE) within the same column followed by the same letter are not significant difference ( $P > 0.05$ , Fisher's LSD).

**Table 4.** Life table parameters of *C. sasakii* on various host plants

| Host plants | Intrinsic rate of increase ( $r_m$ ) | Net reproduction rate ( $R_0$ ) | Mean generation time ( $T$ ) | Finite rate of increase ( $\lambda$ ) | Doubling time ( $Dt$ ) |
|-------------|--------------------------------------|---------------------------------|------------------------------|---------------------------------------|------------------------|
| Apricot     | 0.1128                               | 67.07                           | 37.29                        | 1.1194                                | 6.15                   |
|             | 0.1105 $\approx$ 0.1151              | 60.99 $\approx$ 72.25           | 37.20 $\approx$ 37.38        | 1.1168 $\approx$ 1.1220               | 6.01 $\approx$ 6.26    |
| Plum        | 0.1294                               | 77.78                           | 33.65                        | 1.1381                                | 5.37                   |
|             | 0.1269 $\approx$ 0.1322              | 56.40 $\approx$ 98.48           | 33.32 $\approx$ 33.98        | 1.1290 $\approx$ 1.1476               | 5.01 $\approx$ 5.68    |
| Peach       | 0.1044                               | 44.73                           | 36.42                        | 1.1100                                | 6.64                   |
|             | 0.1008 $\approx$ 0.1097              | 37.62 $\approx$ 52.12           | 36.24 $\approx$ 36.62        | 1.1060 $\approx$ 1.1159               | 6.27 $\approx$ 6.85    |
| Jujube      | 0.1201                               | 117.49                          | 39.70                        | 1.1276                                | 5.77                   |
|             | 0.1140 $\approx$ 0.1265              | 88.14 $\approx$ 146.81          | 39.36 $\approx$ 40.05        | 1.1207 $\approx$ 1.1349               | 5.46 $\approx$ 6.06    |
| Apple       | 0.0987                               | 59.22                           | 41.37                        | 1.1037                                | 7.03                   |
|             | 0.0891 $\approx$ 0.1089              | 36.16 $\approx$ 81.84           | 40.65 $\approx$ 42.09        | 1.0931 $\approx$ 1.1150               | 6.27 $\approx$ 7.69    |
| Pear        | 0.0860                               | 34.92                           | 41.31                        | 1.0898                                | 8.06                   |
|             | 0.0826 $\approx$ 0.0899              | 29.53 $\approx$ 39.63           | 41.02 $\approx$ 41.68        | 1.0861 $\approx$ 1.0940               | 7.65 $\approx$ 8.35    |

Note: data in each cell consist of original parameters, and associated 95% CL of Jackknife estimates.

opment in various ways including physical condition, nutrition, and toxic substances (Kim and Lee 2002, Ishiguri and Toyoshima 2006). Our study demonstrated that there were no variation in hatching rates, cocooning rates and emergence rates of *C. sasakii* reared on the host plants evaluated. Therefore, the variable survival reported in the present paper may mainly attribute to the boring and exiting rates. Our results indicated that high mortality occurred during boring period when the pest fed on peach, but a high exiting rate was also observed on this host. We presume that the boring rates were directly affected by physical characteristics such as hardness or hairiness of fruit. However, Ishiguri and Toyoshima (2006) reported that most newly hatched *C. sasakii* larvae could successfully penetrate young apple fruit which are harder than more mature fruit. Thus, fruit firmness might be inconclusive as a cause of the different boring rates; the low boring rate found on peach in our study might be because of the long and dense hair, which would make it more difficult for larvae to penetrate peach fruit. However, the highly variable exiting rates of larvae in current study might be a reflection of nutrition or toxic substances in the fruit. This suggestion is supported by Kim and Lee (2002), who found that concentrations of the phenolic compounds that changed seasonally in growing fruit could affect larval survivorship of *C. sasakii*, larval survival in growing apple could be low. Ishiguri and Toyoshima (2006) also reported that the larval survival rate of *C. sasakii* differed significantly depending on whether the apple was picked from the tree. Thus, interpretation of our data on impacts of host plants on *C. sasakii* in orchards may be somewhat limited in that we used excised fruit, although a large portion of larvae may develop in fruits that have prematurely dropped from trees because of *C. sasakii* damage or other factors such as early season thinning or harvesting, future studies need to be carried out at field conditions by using wild populations and growing fruits to evaluate the exact effects of various host plants on the pest. Moreover, in our study the exact cause of the variations in larval growth rates, mortality, and adult fecundity among host plants remains unknown, further work is required to investigate possible biochemical reasons for these differ-

ences (e.g., nutrient availability of the host plant species) (Hwang et al. 2008).

**Acknowledgments**

We are thankful to Paul Zwack and Min Zhong (Department of Entomology and Plant Pathology, Auburn University) for their constructive suggestions and kind linguistic correction of early drafts of the manuscript. We are grateful to two anonymous reviewers for their valuable suggestions on our manuscript. This study was partially supported by the National Special Fund for Agro-scientific Research in the Public Interest (No. 201103024).

**References Cited**

Birch, L. C. 1948. The intrinsic rate of natural increase of an insect population. *J. Anim. Ecol.* 17: 15–26.

[CABI/EPPO] Centre for Agriculture and Bioscience International/European and Mediterranean Plant Protection Organization. 1990. Data sheets on quarantine pests *Carposina niponensis*. CABI/EPPO, London/Paris, United Kingdom/France.

Chang, N. X., L. Y. Chang, Z. Q. Shi, and K. H. Hwang. 1977. Study on the biology of the apple fruit moth - Influences of the fruits on the establishment, growth and diapause of the larvae. *Acta Entomol. Sin.* 20: 170–176.

de Maia, A.H.N., A.J.B. Luiz, and C. Campanhola. 2000. Statistical influence on associated fertility life table parameters using jackknife technique, computational aspects. *J. Econ. Entomol.* 93: 511–518.

Hua, L. 1993. The biological character differences of *Carposina niponensis* Walsingham living on different hosts. *Acta Univ. Agric. Boreali-occidentalis.* 21: 99–103.

Hua, L. and B. Z. Hua. 1995. Preliminary study on the host-biotypes of peach fruit borer. *Acta Phytopylacica Sin.* 22: 165–170.

Hua, B. Z., X. H. Zeng, and H. Zhao. 1996. Influences of apple maturity on the development and diapause of *Carposina sasakii* Matsumura. *Acta Univ. Agric. Boreali-occidentalis.* 24: 35–38.

Hua, B. Z., X. H. Zeng, and H. Zhao. 1998a. Diapause of *Carposina sasakii* Matsumura (Lepidoptera: Carposinidae) on various host plants. *Acta Univ. Agric. Boreali-occidentalis.* 26: 25–29.

Hua, B. Z., A. J. Zhang, X. Z. Lu, and L. Hua. 1998b. Seasonal history of *Carposina sasakii* Matsumura on apricot orchard in Qinling mountain region, Shanxi. *Acta Agric. Boreali-occidentalis.* 7: 32–35.

- Hwang, K. H., W. C. Woo, S. L. Hwang, M. T. Cheo, P. C. Lee, T. Chiang, Y. F. Cheo, I. F. Hsin, C. Chu, L. Y. Chang, et al. 1958. Study on the biology and chemical control of the apple fruit borer, *Carpocapsa niponensis* Walsingham (Lepidoptera, Carposinidae). *Acta Oecon.-Entomol. Sin.* 1: 31–66.
- Hwang, S. Y., C. H. Liu, and T. C. Shen. 2008. Effects of plant nutrient availability and host plant species on the performance of two *Pieris* butterflies (Lepidoptera: Pieridae). *Biochem. Syst. Ecol.* 36: 505–513.
- Ishiguri, Y., and S. Toyoshima. 2006. Larva survival and development of the peach fruit moth, *Carpocapsa sasakii* (Lepidoptera: Carposinidae), in picked and unpicked apple fruits. *Appl. Entomol. Zool.* 41: 685–690.
- Kim, D. S., and J. H. Lee. 2002. Egg and larva survivorship of *Carpocapsa sasakii* (Lepidoptera: Carposinidae) in apple and peach and their effects on adult population dynamics in orchards. *Environ. Entomol.* 31: 686–692.
- Kim, D. S., J. H. Lee, and M. S. Yiem. 2000. Spring emergence pattern of *Carpocapsa sasakii* (Lepidoptera: Carposinidae) in apple orchards in Korea and its forecasting models based on degree-days. *Environ. Entomol.* 29: 1188–1198.
- Kim, D. S., J. H. Lee, and M. S. Yiem. 2001. Temperature-dependent development of *Carpocapsa sasakii* (Lepidoptera: Carposinidae) and its stage emergence models. *Environ. Entomol.* 30: 298–305.
- Krips, O. E., A. Witala, P. E. L. Willems, and M. Dicke. 1998. Intrinsic rate of population increase of the spider mite *Tetranychus urticae* on the ornamental crop Gerbera: intraspecific variation in host plant and herbivore. *Entomol. Exp. Appl.* 89: 159–168.
- Li, D. X., H. W. Wang, J. Y. Wang, Z. K. Kang, J. F. Dong, and Z. R. Shen. 2010a. Life table of the laboratory population of the peach fruit borer, *Carpocapsa sasakii* Matsumura at different temperatures. *Acta Entomol. Sin.* 53: 773–779.
- Li, D. X., Y. T. Zhu, W. L. Li, and Y. X. Zhao. 2010b. Population dynamics of peach fruit borer in western region of Henan Province, pp. 82–88. *In* L. Z. Wen, Y. Z. Li, Z. L. Liu, and G. H. Li (eds.), *Central China entomology*. Central South University Press, Hunan, P. R. China.
- Li, S. H. 2003. Fruit production in the world and the suggestions for increasing competition of Chinese fruit products in international markets. *J. China Agric. Univ.* 8: 7–13.
- Ling, F., P. Wang, Y. Y. Wang, Y. Yu, and L. L. Li. 2010. Studies on the occurrence dynamics and damage of fruit boring insect pests in Feicheng peach single garden of Shandong. *J. Shanxi Agric. Univ.* 30: 320–324.
- Liu, Y. S., J. A. Chen, and J. Y. Mou. 1997. Review of the advances of the peach fruit-borer (*Carpocapsa sasakii* Matsumura). *J. Shandong Agric. Univ.* 28: 207–214.
- Meyer, J. S., C. G. Igersoll, and L. L. MacDonald. 1986. Estimating uncertainty in population growth rate, jack-knife vs bootstrap techniques. *Ecology* 67: 1156–1166.
- Myers, C. T., L. A. Hull, and G. Krawczyk. 2007. Effects of orchard host plants (apple and peach) on development of oriental fruit moth (Lepidoptera: Tortricidae). *J. Econ. Entomol.* 100: 421–430.
- Price, P. W., C. E. Bouton, P. Gross, B. A. McPherson, J. N. Thompson, and A. E. Weis. 1980. Interactions among three trophic levels: Influence of plants on interactions between insect herbivores and natural enemies. *Annu. Rev. Ecol. Syst.* 11: 41–65.
- SAS Institute. 1999. SAS user's guide: statistics, version 6. SAS Institute, Cary, NC.
- Southwood, T. R. E., and P. A. Henderson. 2000. *Ecological methods: with particular reference to the study of insect populations*, 3rd ed. Blackwell, Oxford, United Kingdom.
- Toshima, A., K. Honma, and S. Masaki. 1961. Factors influencing the seasonal incidence and breaking of diapause in *Carpocapsa niponensis* Walsingham. *Jpn. J. Appl. Entomol. Zool.* 5: 260–269.
- Toyoshima, S., T. Arai, and K. Yaginuma. 2010. Effect of constant temperature on the development of peach fruit moth, *Carpocapsa sasakii* (Lepidoptera: Carposinidae). *Bull. Natl. Inst. Fruit Tree Sci.* 10: 1–8.
- Tung, T. C., P. L. Liu, and K. H. Hwang. 1964. Studies on the bionomics and control of the apple fruit borer, *Carpocapsa niponensis* Walsingham, on Chinese date. *Acta Phytolacica Sin.* 3: 361–370.
- Varley, G. C., and G. R. Gradwell. 1970. Recent advance in insect population dynamics. *Annu. Rev. Entomol.* 15: 1–24.
- Xu, Q. G., and B. Z. Hua. 2004. RAPD analysis on the speciation in host races of *Carpocapsa sasakii* Matsumura (Lepidoptera: Carposinidae). *Acta Entomol. Sin.* 47: 379–383.

Received 27 September 2011; accepted 26 December 2011.
